# Supplementary material for: Rapid Flood Mapping from Aerial Imagery Using Fine-Tuned SAM and ResNet-Backboned U-Net
Source: Copernicus journal article supplement (doi:10.5194/egusphere-2025-3146), 2025-08-08
Supplement: Supplementary file [file egusphere-2025-3146-AC3-supplement.pdf]

Dear Armin,

We would like to express our sincere gratitude for your time and feedback on our manuscript, " **Rapid Flood Mapping from Aerial Imagery Using Fine-Tuned SAM and ResNet-Backboned U-Net.**"

**The author's reply to the comment:**

| Comment                                                                                                                                                                                                                                                                                                                                                                                                                                                                                                                                                                                                                                                                                                                                                                                                       | Response                                                                                                                                                                                                                                                                                                                                                                                                                                                                                                                                                                                                                                                                                                                                                                                                                                                                                                                                                                                                                                                                                                                                                                                                                                      |
|---------------------------------------------------------------------------------------------------------------------------------------------------------------------------------------------------------------------------------------------------------------------------------------------------------------------------------------------------------------------------------------------------------------------------------------------------------------------------------------------------------------------------------------------------------------------------------------------------------------------------------------------------------------------------------------------------------------------------------------------------------------------------------------------------------------|-----------------------------------------------------------------------------------------------------------------------------------------------------------------------------------------------------------------------------------------------------------------------------------------------------------------------------------------------------------------------------------------------------------------------------------------------------------------------------------------------------------------------------------------------------------------------------------------------------------------------------------------------------------------------------------------------------------------------------------------------------------------------------------------------------------------------------------------------------------------------------------------------------------------------------------------------------------------------------------------------------------------------------------------------------------------------------------------------------------------------------------------------------------------------------------------------------------------------------------------------|
| <p>Dear authors,</p> <p>I read the paper, and I see the method used by the authors, and also the code is derived from the following paper and GitHub: ArminMoghim/Fine-tune-the-Segment-Anything-Model-SAM-: A. Moghimi, M. Welzel, T. Celik, and T. Schlurmann, "A Comparative Performance Analysis of Popular Deep Learning Models and Segment Anything Model (SAM) for River Water Segmentation in Close-Range Remote Sensing Imagery," <a href="https://github.com/ArminMoghim/Fine-tune-the-Segment-Anything-Model-SAM-">https://github.com/ArminMoghim/Fine-tune-the-Segment-Anything-Model-SAM-</a> <a href="https://doi.org/10.1109/ACCESS.2024.3385425">https://doi.org/10.1109/ACCESS.2024.3385425</a></p> <p>However, I couldn't see this reference in the reference list, which it should be.</p> | <p>We appreciate your feedback. After a thorough review, we did not find any similarities between our code and the one you mentioned. Our implementation originates from our previous article published in <i>CATENA</i>, where we focused on segmenting erosion and deposition. That codebase is the result of years of experience and numerous meetings with domain experts. We therefore respectfully clarify that our implementation is fully independent and not derived from the repository you mentioned. We highly recommend reading the article linked below for a better understanding of the foundations of our approach. <a href="https://www.sciencedirect.com/science/article/pii/S0341816225002565">https://www.sciencedirect.com/science/article/pii/S0341816225002565</a></p> <p>We were not aware of your article and code before, but we appreciate your work — it is a valuable contribution to the field. If we had seen it earlier, we would have certainly benefited from it. In the academic community, the shared goal is to advance the state of the art, and we are no exception. To support this goal, we will include a comparison with your results in the results section of our revised manuscript, which</p> |

|  |                                                                                                                           |
|--|---------------------------------------------------------------------------------------------------------------------------|
|  | <p>we are confident will further enhance the quality of the paper.</p> <p>Thank you again for your valuable feedback.</p> |
|--|---------------------------------------------------------------------------------------------------------------------------|
